# Supplementary material for: Interplay Between the IL-33/ST2 Axis and Bone Marrow ILC2s in Protease Allergen-Induced IL-5-Dependent Eosinophilia
Source: PubMed Central journal article supplement (PMC7280539; doi:10.3389/fimmu.2020.01058), 2020-06-02
Supplement: Table_1.pdf [file Table_1.pdf]

Supplemental Table 1

| <b>Antigen (clone)</b>                                                                                                          | <b>Format</b> | <b>Manufacturer</b>     |
|---------------------------------------------------------------------------------------------------------------------------------|---------------|-------------------------|
| <b>Hematopoietic Lineage cocktail: CD3 (17A2), CD45R/B220 (RA3-6B2), CD11b (M1/70), TER-119 (TER-119), Ly-G6/Gr-1 (RB6-8C5)</b> | FITC          | ThermoFisher Scientific |
| <b>CD11c (N418)</b>                                                                                                             | FITC          | ThermoFisher Scientific |
| <b>CD19 (1D3)</b>                                                                                                               | FITC          | BD Bioscience           |
| <b>NK-1.1 (PK136)</b>                                                                                                           | FITC          | BD Bioscience           |
| <b>FceR1 (MAR-1)</b>                                                                                                            | FITC          | ThermoFisher Scientific |
| <b>CD34 (RAM34)</b>                                                                                                             | FITC          | BD Bioscience           |
| <b>CD127/IL-7Ra (A7R34)</b>                                                                                                     | PE            | ThermoFisher Scientific |
| <b>CD125 (T21)</b>                                                                                                              | PE            | BD Bioscience           |
| <b>CD45 (30-F11)</b>                                                                                                            | PerCP         | BD Bioscience           |
| <b>CD25 (PC61)</b>                                                                                                              | APC           | BD Bioscience           |
| <b>ST2/IL-33R (RMST2-2)</b>                                                                                                     | APC           | ThermoFisher Scientific |
| <b>Siglec-F (E50-2440)</b>                                                                                                      | AF647         | BD Bioscience           |
| <b>CD25/IL-2RA (PC61)</b>                                                                                                       | BV421         | BD Bioscience           |
| <b>CD193/CCR3 (J073E5)</b>                                                                                                      | BV421         | BioLegend               |
| <b>IL-5 (TRFK5)</b>                                                                                                             | BV421         | BioLegend               |
| <b>Isotype control IL-5/Rat IgG1, <math>\kappa</math> (RTK2071)</b>                                                             | BV421         | BioLegend               |
